# Supplementary material for: Rank-based characterization of pollen assemblages collected by honey bees using a multi-locus metabarcoding approach
Source: PubMed Central journal article supplement — Appl Plant Sci. 2015 Oct 30;3(11):apps.1500043. doi: 10.3732/apps.1500043 (PMC4651628; doi:10.3732/apps.1500043), 2015-10-30

Appendix S5. Venn diagram of the completeness of each reference library. (A) Venn diagram showing all plant species known to be in Ohio and surrounding states based on the USDA PLANTS Database. (B) Venn diagram showing all plant genera known to be in Ohio and surrounding states based on the USDA PLANTS Database. Numbers within sets and unions represent completeness of reference databases used for BLAST alignment. Sets and unions are not drawn to scale.

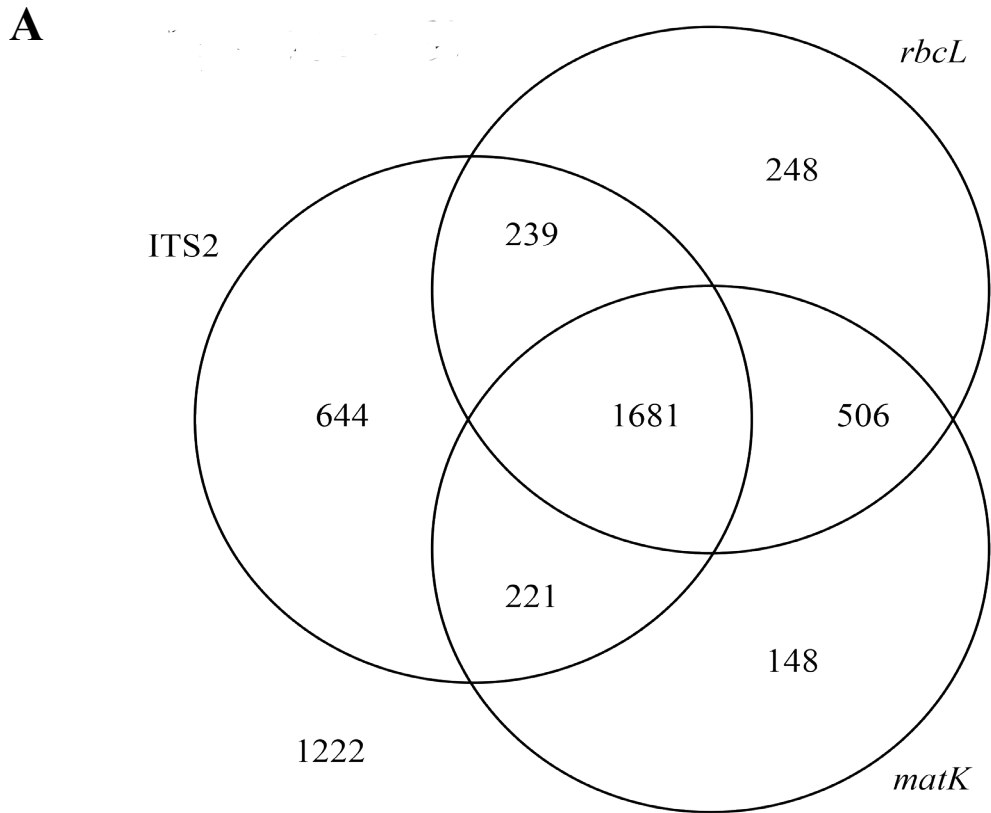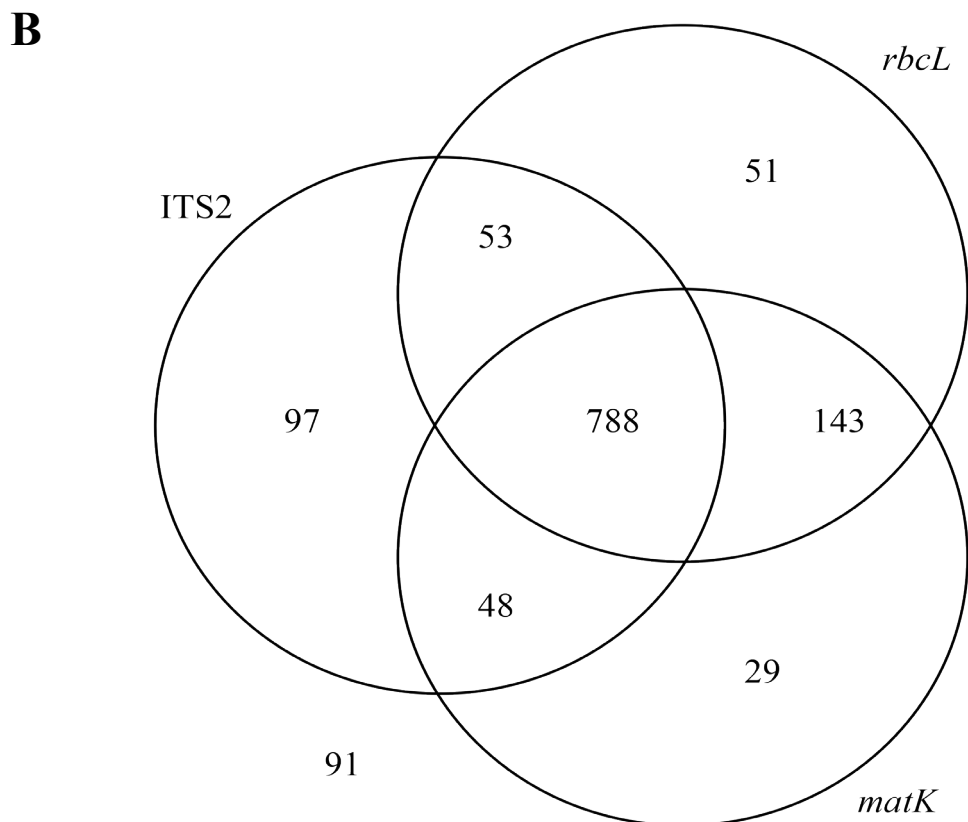

Supplement: apps.1500043_s5.pdf [file apps.1500043_s5.pdf]
